# Supplementary material for: Colloidal silver nanoparticles: an effective nano-filler material to prevent fungal proliferation in bamboo
Source: Royal Society of Chemistry journal article supplement (doi:10.1039/c6ra12516f), 2016-01-01
Supplement: c6ra12516f1.pdf [file c6ra12516f1.pdf]

SUPPORTING INFORMATION

**Colloidal silver nanoparticles: an effective nano-filler material to prevent fungal proliferation in bamboo**

O. Pandoli,<sup>a</sup> R. D. S. Martins,<sup>a</sup> E. C. Romani,<sup>b</sup> S. Paciornik,<sup>c</sup> M. H. D. P. Maurício,<sup>c</sup> H. D. L. Alves,<sup>d</sup> F. V. Pereira-Meirelles,<sup>a</sup> E. L. Luz,<sup>a</sup> S. M. L. Koller,<sup>a</sup> H. V. Rouco<sup>c</sup> and K. Ghavami<sup>e</sup>

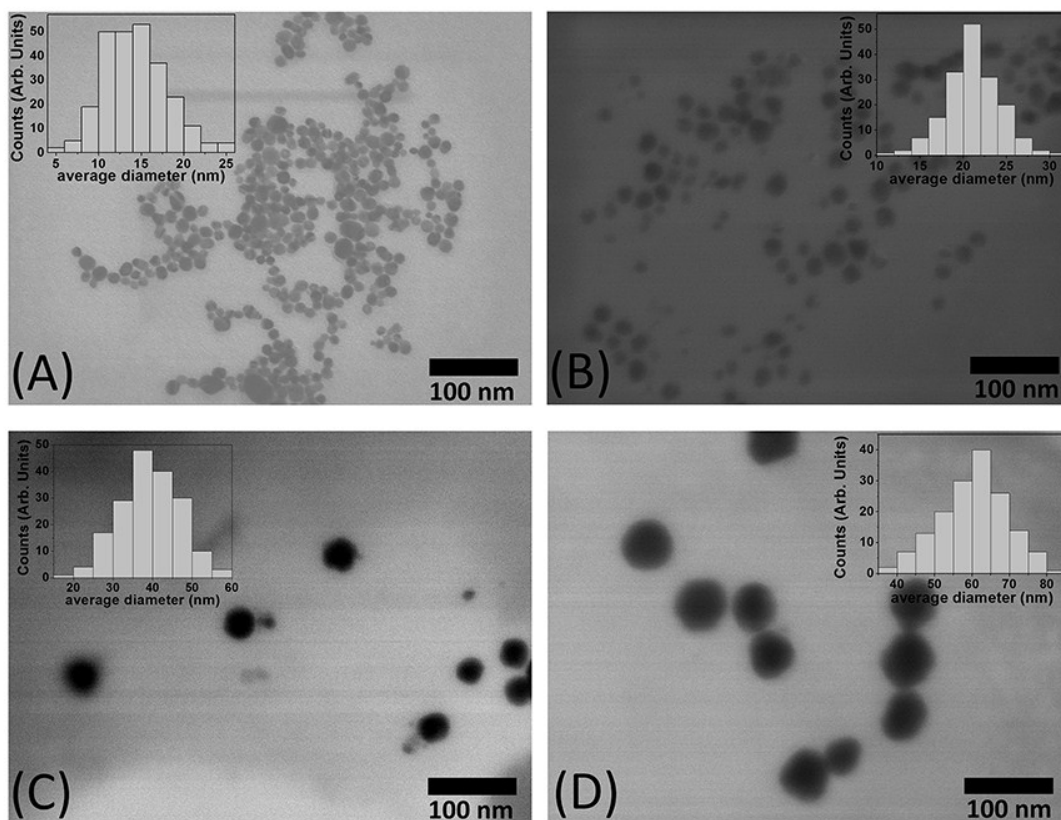

Figure S1. TEM images of silver nanoparticles with trisodium citrate as organic stabilizer. Inset, diameter distribution for (a) NP-01 ( $14.3 \pm 3.6$  nm), (b) CO-20 ( $21.2 \pm 3.2$  nm), (c) CO-40 ( $38.9 \pm 7.3$  nm) e (d) CO-60 ( $60.3 \pm 8.9$  nm).
